# Supplementary material for: Novel catenated N6energetic compounds based on substituted 1,2,4-triazoles: synthesis, structures and properties
Source: Royal Society of Chemistry journal article supplement (doi:10.1039/c8ra02491j), 2018-01-01
Supplement: c8ra02491j1.pdf [file c8ra02491j1.pdf]

## Supporting Information

### **Novel catenated N<sub>6</sub> energetic compounds based on substituted 1,2,4-triazoles: syntheses, structures and properties**

Yanan Li,<sup>\*a</sup> Bin Wang,<sup>a</sup> Pei Chang,<sup>a</sup> Jianjian Hu,<sup>a</sup> Tao Chen,<sup>a</sup> Yinglei Wang,<sup>\*a</sup> and Bozhou Wang<sup>a</sup>

State Key Laboratory of Fluorine & Nitrogen Chemicals, Xi'an Modern Chemistry Research Institute, Xi'an, Shanxi 710065, People's Republic of China

Email: lyn2003080094@126.com

#### **Table of Contents**

- 1. X-ray crystallography**
- 2. NMR spectroscopies and DSC curves**
- 3. Theoretical study**

## 1. X-ray crystallography

Single crystals suitable for X-ray measurement was obtained by slow evaporation of aqueous solution of ABCNT at room temperature. Bond lengths, bond angles and torsion angles of the data collection and refinement are given in Table S1–S2. The CIF files of ABCNT have been deposited at the Cambridge Crystallographic Data Centre as supplementary publication 1826501.

**Table S1.** Bond lengths[Å] for the structure of ABCNT.

|             |          |             |          |
|-------------|----------|-------------|----------|
| Cl(1)-C(1)  | 1.672(5) | N(6)-N(6)#2 | 1.248(8) |
| Cl(2)-C(3)  | 1.670(6) | N(6)-N(7)   | 1.384(5) |
| N(1)-N(1)#1 | 1.240(7) | N(7)-N(8)   | 1.348(6) |
| N(1)-N(2)   | 1.373(5) | N(7)-C(3)   | 1.361(6) |
| N(2)-C(1)   | 1.352(6) | N(8)-C(4)   | 1.310(6) |
| N(2)-N(3)   | 1.369(5) | N(9)-C(3)   | 1.306(7) |
| N(3)-C(2)   | 1.291(6) | N(9)-C(4)   | 1.349(7) |
| N(4)-C(1)   | 1.306(6) | N(10)-O(4)  | 1.212(6) |
| N(4)-C(2)   | 1.340(6) | N(10)-O(3)  | 1.213(6) |
| N(5)-O(1)   | 1.192(6) | N(10)-C(4)  | 1.454(7) |
| N(5)-O(2)   | 1.209(6) |             |          |
| N(5)-C(2)   | 1.459(7) |             |          |

Symmetry transformations used to generate equivalent atoms: #1 -x,-y,-z; #2 -x+1,-y,-z+2

**Table S2.** Bond angles [deg] and torsion angles [deg] for the structure of ABCNT.

|                  |          |                       |           |
|------------------|----------|-----------------------|-----------|
| N(1)#1-N(1)-N(2) | 110.7(5) | N(1)#1-N(1)-N(2)-C(1) | -175.0(5) |
| C(1)-N(2)-N(3)   | 109.4(4) | N(1)#1-N(1)-N(2)-N(3) | 8.2(8)    |
| C(1)-N(2)-N(1)   | 124.0(4) | C(1)-N(2)-N(3)-C(2)   | -0.5(5)   |
| N(3)-N(2)-N(1)   | 126.5(4) | N(1)-N(2)-N(3)-C(2)   | 176.8(4)  |
| C(2)-N(3)-N(2)   | 99.8(4)  | N(6)#2-N(6)-N(7)-N(8) | 2.7(8)    |
| C(1)-N(4)-C(2)   | 100.7(4) | N(6)#2-N(6)-N(7)-C(3) | -176.9(5) |
| O(1)-N(5)-O(2)   | 124.9(5) | C(3)-N(7)-N(8)-C(4)   | -0.2(6)   |
| O(1)-N(5)-C(2)   | 117.3(5) | N(6)-N(7)-N(8)-C(4)   | -179.8(4) |
| O(2)-N(5)-C(2)   | 117.7(5) | C(2)-N(4)-C(1)-N(2)   | 0.8(6)    |
| N(6)#2-N(6)-N(7) | 109.0(5) | C(2)-N(4)-C(1)-Cl(1)  | -179.6(4) |
| N(8)-N(7)-C(3)   | 110.5(4) | N(3)-N(2)-C(1)-N(4)   | -0.2(6)   |
| N(8)-N(7)-N(6)   | 126.6(4) | N(1)-N(2)-C(1)-N(4)   | -177.6(4) |
| C(3)-N(7)-N(6)   | 122.9(4) | N(3)-N(2)-C(1)-Cl(1)  | -179.9(3) |
| C(4)-N(8)-N(7)   | 100.2(4) | N(1)-N(2)-C(1)-Cl(1)  | 2.8(7)    |
| C(3)-N(9)-C(4)   | 101.6(5) | N(2)-N(3)-C(2)-N(4)   | 1.1(6)    |
| O(4)-N(10)-O(3)  | 125.7(5) | N(2)-N(3)-C(2)-N(5)   | -179.0(4) |
| O(4)-N(10)-C(4)  | 117.3(5) | C(1)-N(4)-C(2)-N(3)   | -1.2(6)   |
| O(3)-N(10)-C(4)  | 117.0(6) | C(1)-N(4)-C(2)-N(5)   | 178.8(5)  |
| N(4)-C(1)-N(2)   | 110.7(4) | O(1)-N(5)-C(2)-N(3)   | 9.0(7)    |
| N(4)-C(1)-Cl(1)  | 126.5(4) | O(2)-N(5)-C(2)-N(3)   | -168.6(5) |

|                 |          |                      |           |
|-----------------|----------|----------------------|-----------|
| N(2)-C(1)-Cl(1) | 122.8(4) | O(1)-N(5)-C(2)-N(4)  | -171.0(5) |
| N(3)-C(2)-N(4)  | 119.3(5) | O(2)-N(5)-C(2)-N(4)  | 11.3(8)   |
| N(3)-C(2)-N(5)  | 119.5(5) | C(4)-N(9)-C(3)-N(7)  | -1.5(6)   |
| N(4)-C(2)-N(5)  | 121.2(5) | C(4)-N(9)-C(3)-Cl(2) | -179.9(5) |
| N(9)-C(3)-N(7)  | 109.8(5) | N(8)-N(7)-C(3)-N(9)  | 1.2(7)    |
| N(9)-C(3)-Cl(2) | 127.0(4) | N(6)-N(7)-C(3)-N(9)  | -179.1(4) |
| N(7)-C(3)-Cl(2) | 123.2(4) | N(8)-N(7)-C(3)-Cl(2) | 179.6(4)  |
| N(8)-C(4)-N(9)  | 117.8(5) | N(6)-N(7)-C(3)-Cl(2) | -0.8(8)   |
| N(8)-C(4)-N(10) | 119.9(5) | N(7)-N(8)-C(4)-N(9)  | -0.9(6)   |
| N(9)-C(4)-N(10) | 122.3(5) | N(7)-N(8)-C(4)-N(10) | -179.8(5) |
|                 |          | C(3)-N(9)-C(4)-N(8)  | 1.6(7)    |
|                 |          | C(3)-N(9)-C(4)-N(10) | -179.6(5) |
|                 |          | O(4)-N(10)-C(4)-N(8) | 13.9(8)   |
|                 |          | O(3)-N(10)-C(4)-N(8) | -164.6(5) |
|                 |          | O(4)-N(10)-C(4)-N(9) | -165.0(5) |
|                 |          | O(3)-N(10)-C(4)-N(9) | 16.6(8)   |

Symmetry transformations used to generate equivalent atoms: #1 -x,-y,-z; #2 -x+1,-y,-z+2

## 2. NMR spectra of all compounds

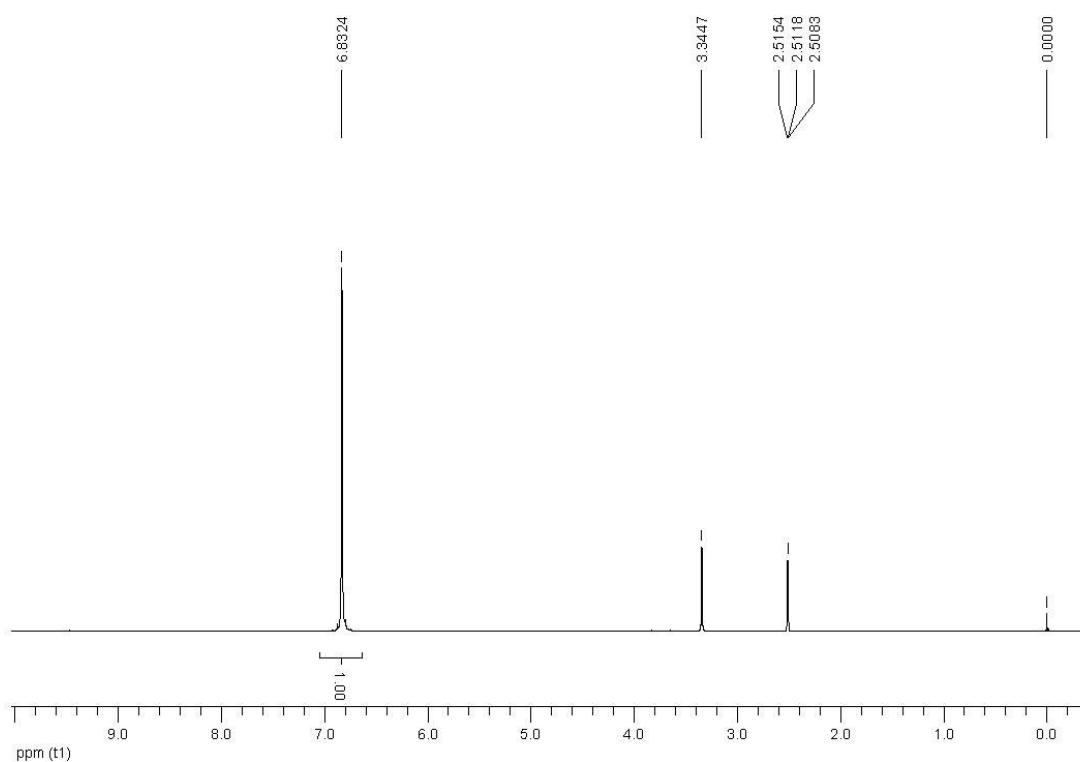

**Fig. S1** <sup>1</sup>H NMR spectrum of ADNT in DMSO-*d*<sub>6</sub>

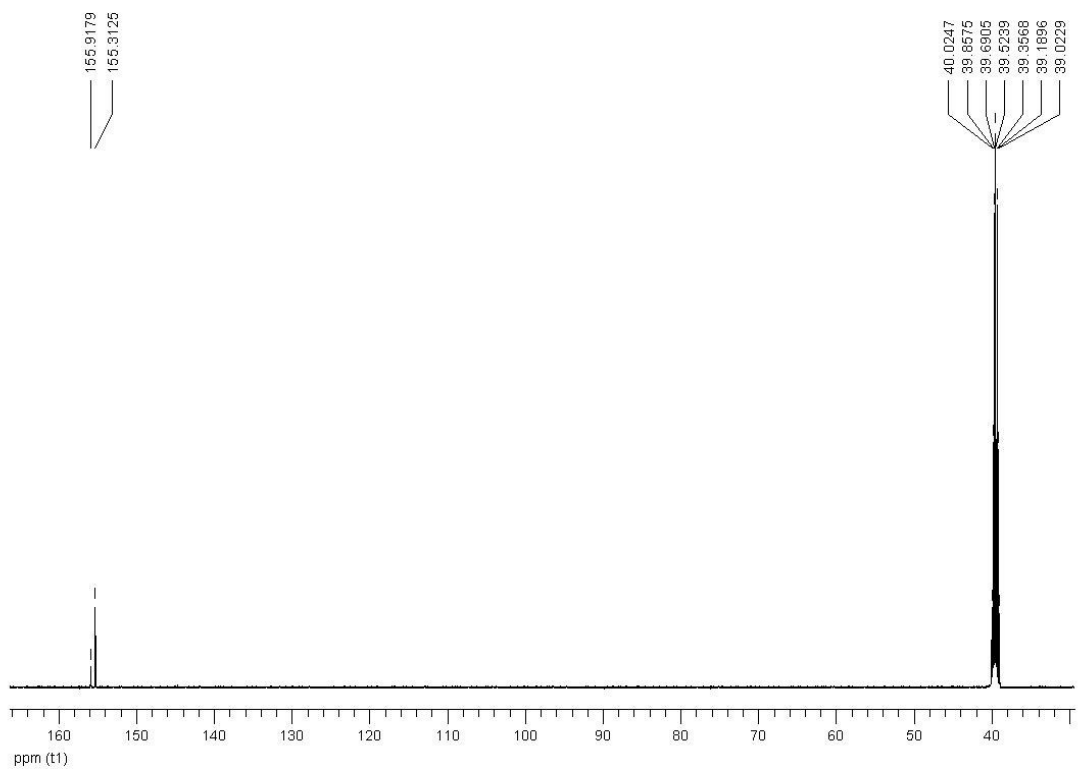

**Fig. S2**  $^{13}\text{C}$  NMR spectrum of ADNT in  $\text{DMSO-}d_6$

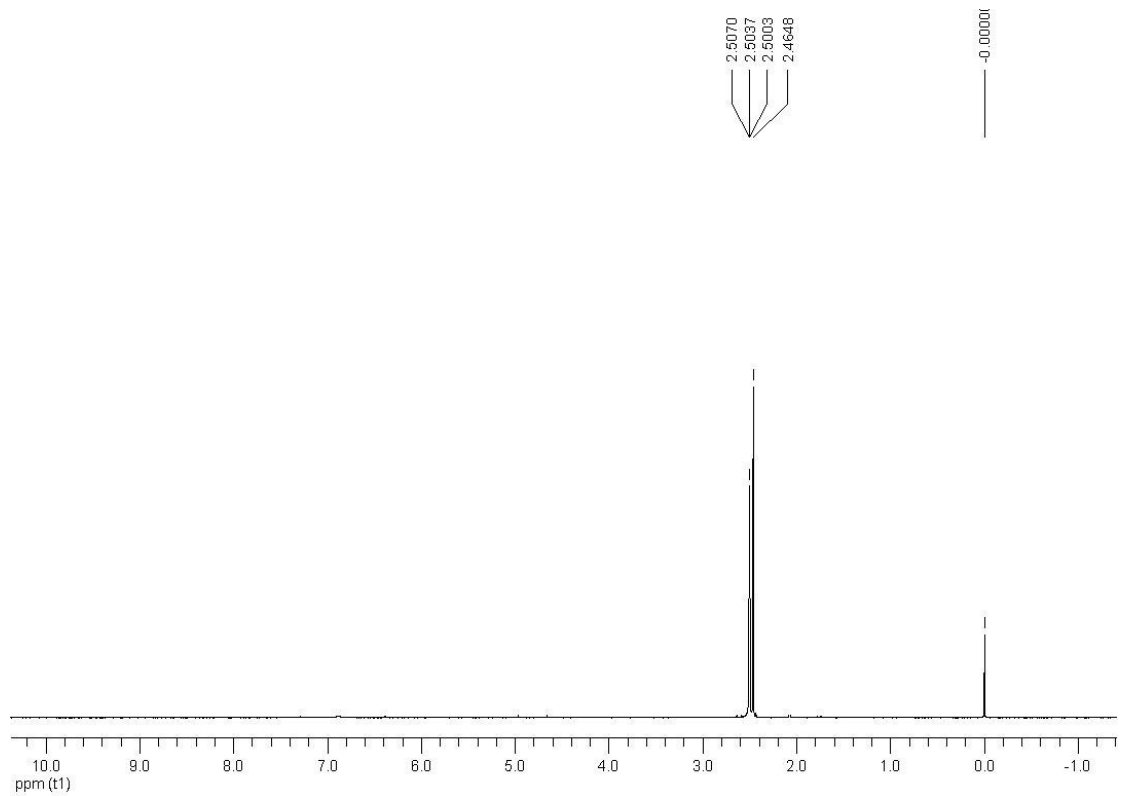

**Fig. S3**  $^1\text{H}$  NMR spectrum of ABDNT in  $\text{DMSO-}d_6$

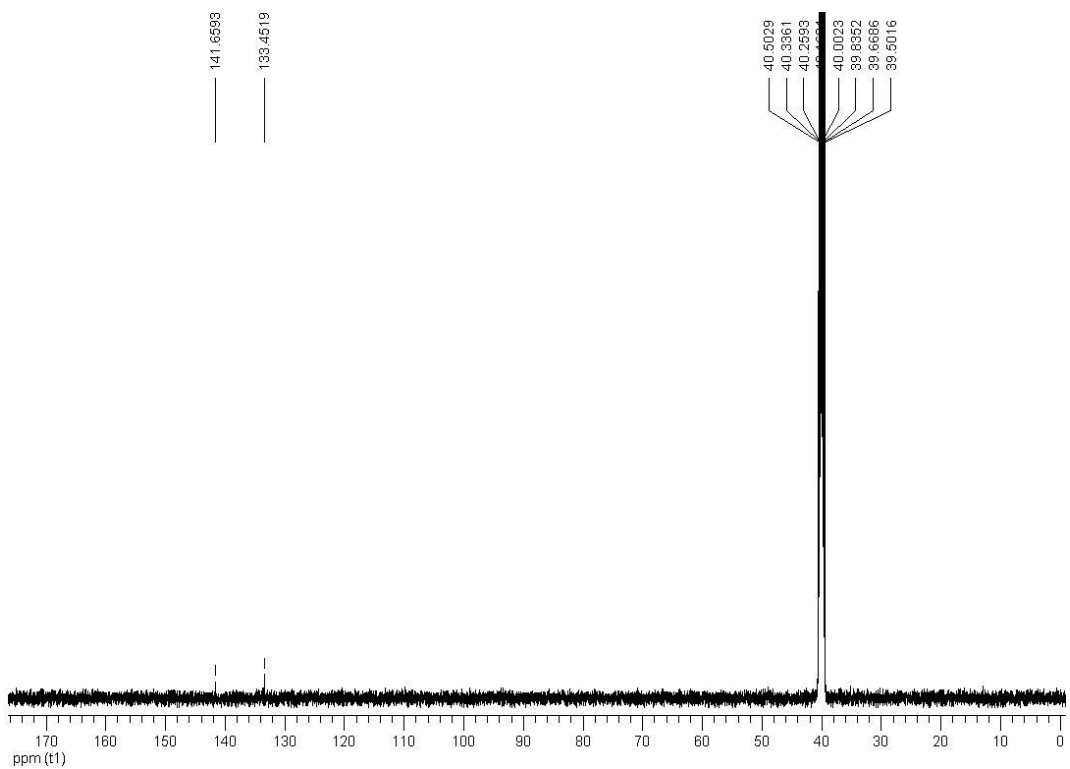

**Fig. S4**  $^{13}\text{C}$  NMR spectrum of ABDNT in  $\text{DMSO-}d_6$

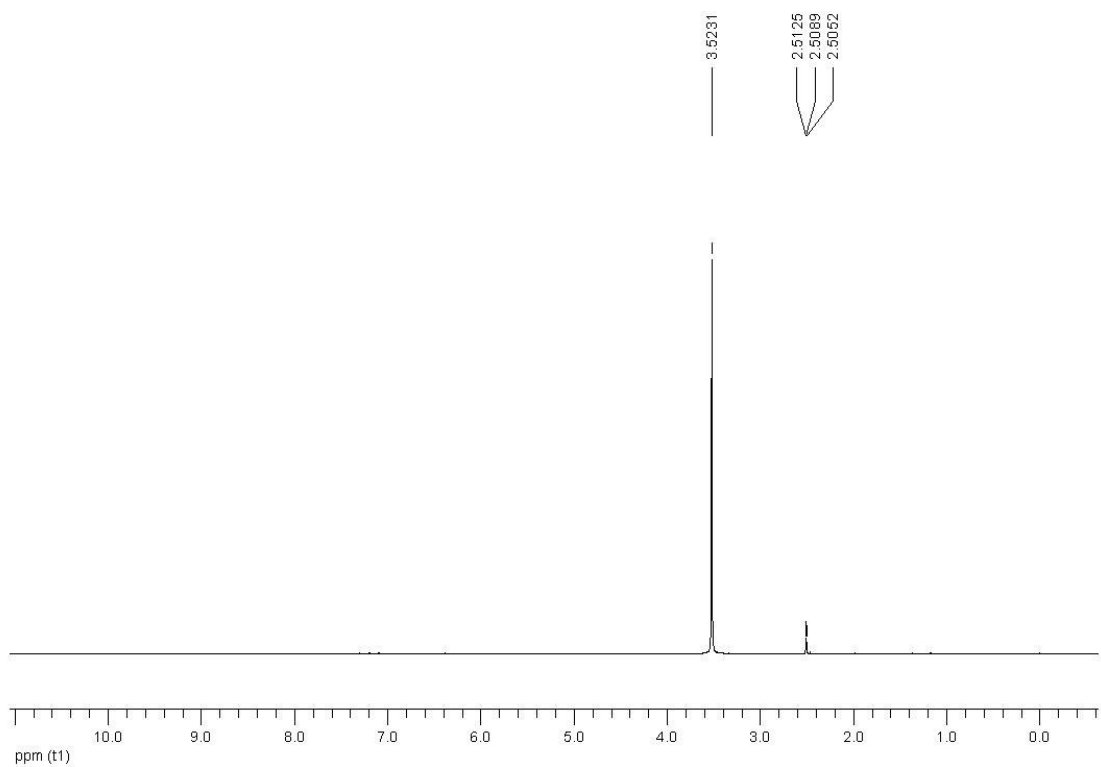

**Fig. S5**  $^1\text{H}$  NMR spectrum of ABCNT in  $\text{DMSO-}d_6$

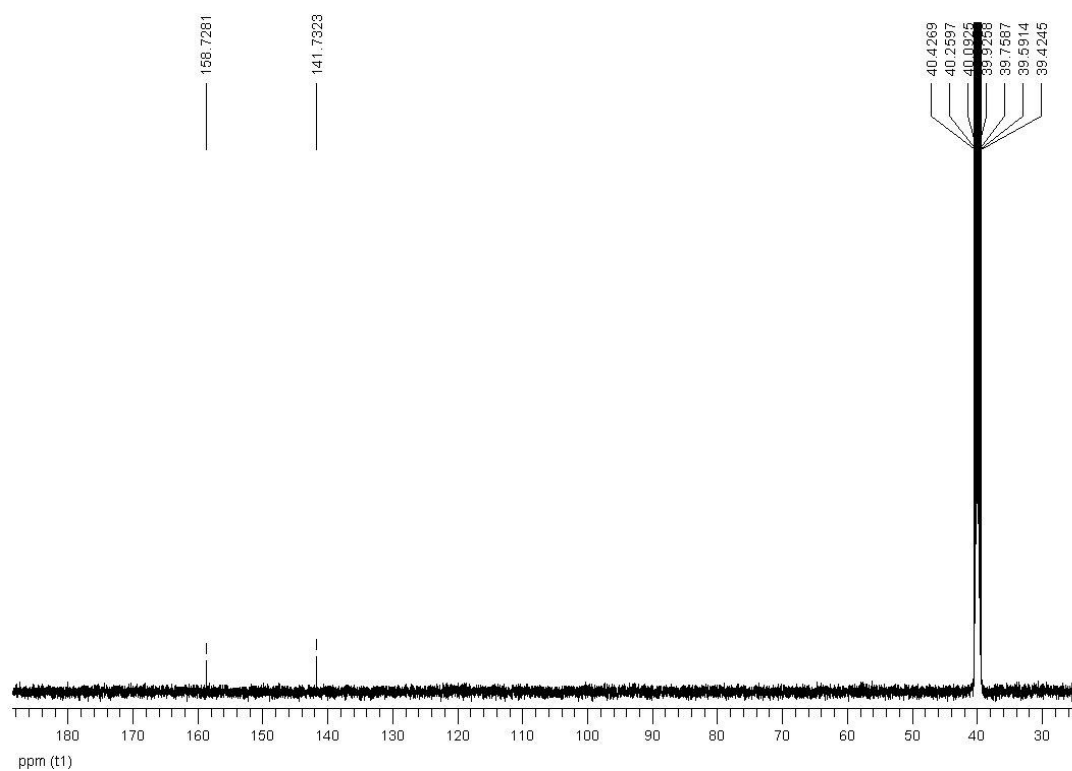

**Fig. S6**  $^{13}\text{C}$  NMR spectrum of ABCNT in  $\text{DMSO-}d_6$

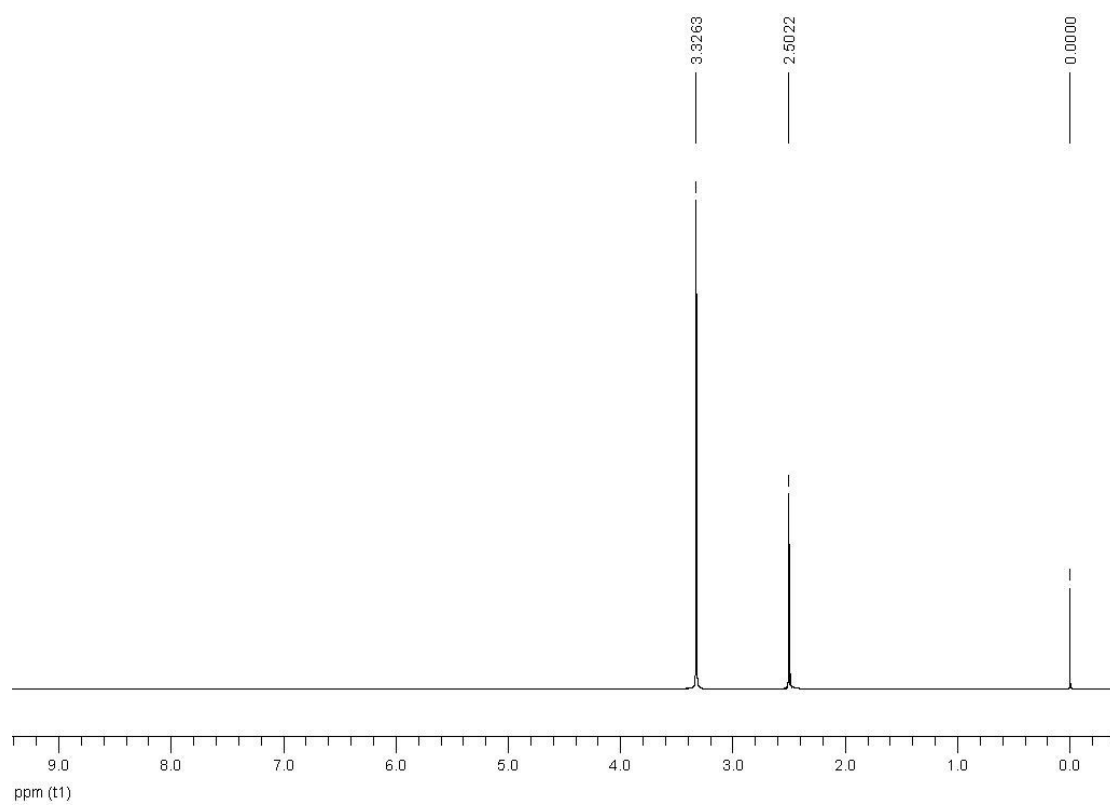

**Fig. S7**  $^1\text{H}$  NMR spectrum of ABDAT in  $\text{DMSO-}d_6$

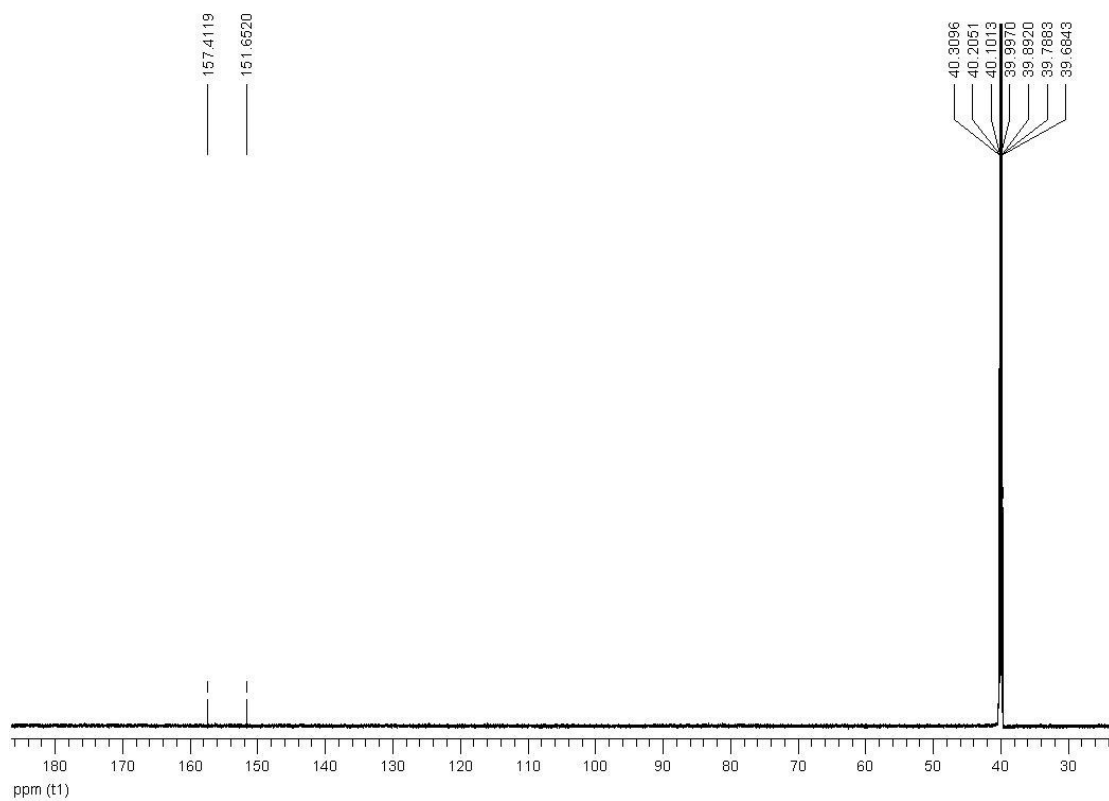

**Fig. S8**  $^{13}\text{C}$  NMR spectrum of ABDAT in  $\text{DMSO-}d_6$

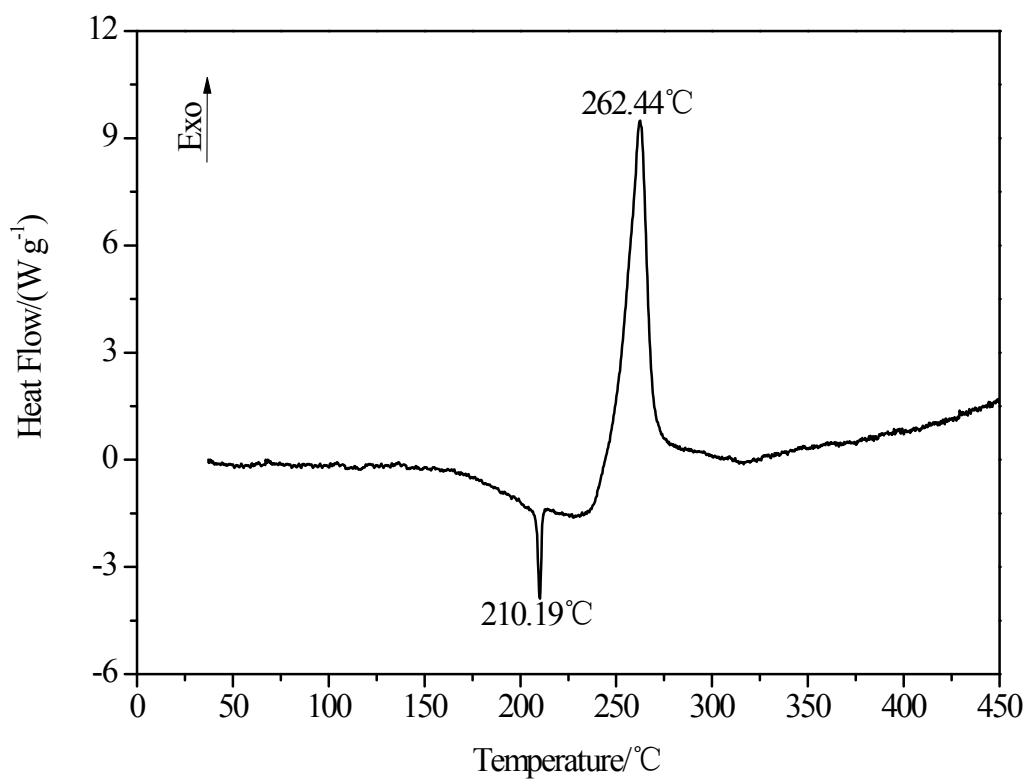

**Fig. S9** DSC curve of ABDNT at heating rate of  $5^\circ\text{C min}^{-1}$

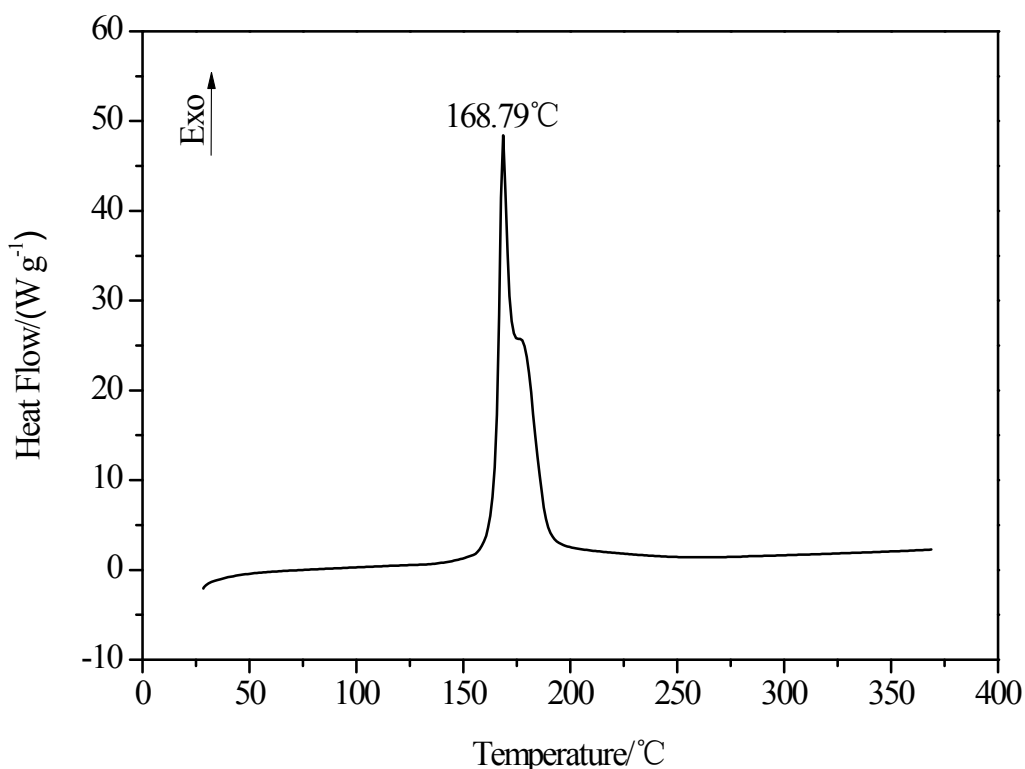

**Fig. S10** DSC curve of ABDAT at heating rate of 5°C min<sup>-1</sup>

### 3. Theoretical study

All quantum chemical calculations were carried out by using the Gaussian 09 (revision A.02) program package and visualized by Gauss View 5.05.<sup>1,2</sup> The gas phase enthalpies of formation (Table S3) were obtained by the atomization method (equation (1)) based on CBS-4M calculated electronic enthalpies using NIST<sup>3</sup> values as standardized values for the standard heats of formation ( $\Delta_f H^\circ$ ) (Table S4).

$$\Delta_f H^\circ_{(g, M, 298)} = H_{(Molecule, 298)} - \sum H^\circ_{(Atoms, 298)} + \sum \Delta_f H^\circ_{(Atoms, 298)} \quad (1)$$

The solid state enthalpies of formation (Table S3) can be determined using the gas-phase enthalpy of formation and enthalpy of sublimation phase transition according to the Hess' law of constant heat summation as the equation (2).<sup>4</sup>

$$\Delta H(\text{solid}) = \Delta H(\text{gas}) - \Delta H(\text{sublimation}) \quad (2)$$

Based on the electrostatic potential of a molecule by quantum mechanical prediction, the heat of sublimation can be represented as the equation (3).<sup>5</sup>

$$\Delta H(\text{sublimation}) = a(SA)^2 + b(\sigma_{Tot}^2 \nu)^{1/2} + c \quad (3)$$

**Table S3.** Heats of formation based on CBS-4M calculations

| Compound     | $-H_{(M, 298)}^{[a]}$ /<br>a.u. | $\Delta_f H^\circ_{(g)}^{[b]}$ /<br>kJ mol <sup>-1</sup> | SA <sup>[c]</sup> /<br>Å <sup>2</sup> | $\sigma_{Tot}^2 \nu^{[d]}$ /<br>(kcal mol <sup>-1</sup> ) <sup>2</sup> | $\Delta H^\circ_{(sub)}^{[e]}$ /<br>kJ mol <sup>-1</sup> | $\Delta_f H^\circ_{(s)}^{[f]}$ /<br>kJ mol <sup>-1</sup> |
|--------------|---------------------------------|----------------------------------------------------------|---------------------------------------|------------------------------------------------------------------------|----------------------------------------------------------|----------------------------------------------------------|
| <b>ABDNT</b> | 1408.902440                     | 1192.06                                                  | 306.93                                | 20.70                                                                  | 218.156                                                  | 973.90                                                   |



|              |             |         |        |       |         |         |
|--------------|-------------|---------|--------|-------|---------|---------|
| <b>ABCNT</b> | 1918.711869 | 901.34  | 285.05 | 29.38 | 126.535 | 774.80  |
| <b>ABDAT</b> | 1245.373322 | 2399.75 | 328.68 | 24.21 | 248.921 | 2150.83 |

[a] CBS-4M electronic enthalpy; [b] gas phase enthalpy of formation; [c] surface area; [d] electrostatic potential of the molecular surface; [e] heat of sublimation; [f] standard solid state heat of formation.

**Table S4.** CBS-4M values and literature values for atomic  $\Delta_f H^\circ$ / kJ mol<sup>-1</sup>

|    | $-H^{298}$ / a.u. | NIST <sup>[5]</sup> / $\Delta_f H^\circ$ (298K) |
|----|-------------------|-------------------------------------------------|
| H  | 0.500991          | 218.2                                           |
| C  | 37.786156         | 717.2                                           |
| N  | 54.522462         | 473.1                                           |
| O  | 74.991202         | 249.5                                           |
| Cl | 459.676936        | 121.3                                           |

## References:

- [1] M. J. Frisch, G. W. Trucks, H. B. Schlegel, G. E. Scuseria, M. A. Robb, J. R. Cheeseman, J. A. Montgomery Jr, T. Vreven, K. N. Kudin, J. C. Burant, J. M. Millam, S. S. Iyengar, J. Tomasi, V. Barone, B. Mennucci, M. Cossi, G. Scalmani, N. Rega, G. A. Petersson, H. Nakatsuji, M. Hada, M. Ehara, K. Toyota, R. Fukuda, J. Hasegawa, M. Ishida, T. Nakajima, Y. Honda, O. Kitao, H. Nakai, M. Klene, X. Li, J. E. Knox, H. P. Hratchian, J. B. Cross, V. Bakken, C. Adamo, J. Jaramillo, R. Gomperts, R. E. Stratmann, O. Yazyev, A. J. Austin, R. Cammi, C. Pomelli, J. W. Ochterski, P. Y. Ayala, K. Morokuma, G. A. Voth, P. Sal-vador, J. J. Dannenberg, V. G. Zakrzewski, S. Dapprich, A. D. Daniels, M. C. Strain, O. Farkas, D. K. Malick, A. D. Rabuck, K. Raghavachari, J. B. Foresman, J. V. Ortiz, Q. Cui, A. G. Ba-boul, S. Clifford, J. Cioslowski, B. B. Stefanov, G. Liu, A. Liashenko, P. Piskorz, I. Komaromi, R. L. Martin, D. J. Fox, T. Keith, M. A. Al-Laham, C. Y. Peng, A. Nanayakkara, M. Challacombe, P. M. W. Gill, B. Johnson, W. Chen, M. W. Wong, C. Gonzalez and J. A. Pople, Gaussian 09, rev. A.02, Gaussian, Inc., Wallingford, CT, 2009.
- [2] T. K. R. Dennington and J. Millam, GaussView 5, V5.0.8, Semichem Inc., Shawnee Mission, 2009.
- [3] P. J. Lindstrom, W. G. Mallard, NIST Chemistry Webbook, NIST Standard Reference 69, June 2005, National Institute of Standards and Technology, Gaithersburg, MD (<http://webbook.nist.gov>).
- [4] P. W. Atkins, Physical Chemistry, Oxford University Press, Oxford, 1982.
- [5] P. Politzer, J. S. Murray, T. Brinck and P. Lane, in Immunoanalysis of Agrochemicals, ACS Symp. Ser. 586, American Chemical Society, Washington, DC, 1994.
